# Supplementary material for: Auxiliary ligand-directed and counter anion-templated effects on coordination networks based on semirigid 2-aminodiacetic terephthalic acid ligand
Source: Royal Society of Chemistry journal article supplement (doi:10.1039/c2ce26553b), 2012-12-11
Supplement: c2ce26553b.pdf [file c2ce26553b.pdf]

## Auxiliary ligand-directed and counter anion-templated effects on coordination networks based on semirigid 2-aminodiacetic terephthalic acid ligand

Jie Ma,<sup>ab</sup> Lian Chen,<sup>a</sup> Ming-Yan Wu,<sup>a</sup> Shu-Quan Zhang,<sup>ab</sup> Ke-Cai Xiong,<sup>ab</sup> Dong Han,<sup>ab</sup> Fei-Long Jiang\*<sup>a</sup>, Mao-Chun Hong\*<sup>a</sup>

<sup>a</sup>Key Laboratory of Coal to Ethylene Glycol and Its Related Technology, State Key Laboratory of Structure Chemistry, Fujian Institute of Research on the Structure of Matter, Chinese Academy of Sciences, Fuzhou, Fujian, 350002, China.

<sup>b</sup>Graduate School of the Chinese Academy of Sciences, Beijing, 100049, China.

To whom correspondence should be addressed. Tel: +86-591-83792460. Fax: +86-591-83794946. E-mail: hmc@fjirsm.ac.cn; fjjiang@fjirsm.ac.cn

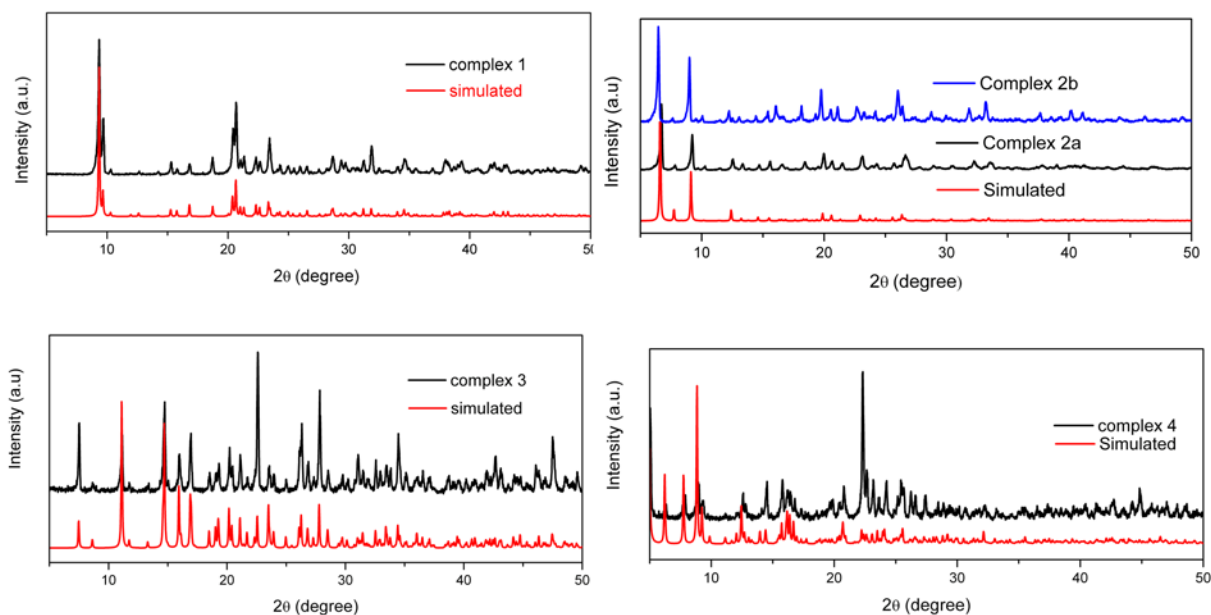

**Fig. S1.** Power X-ray diffraction patterns for complexes 1-4.

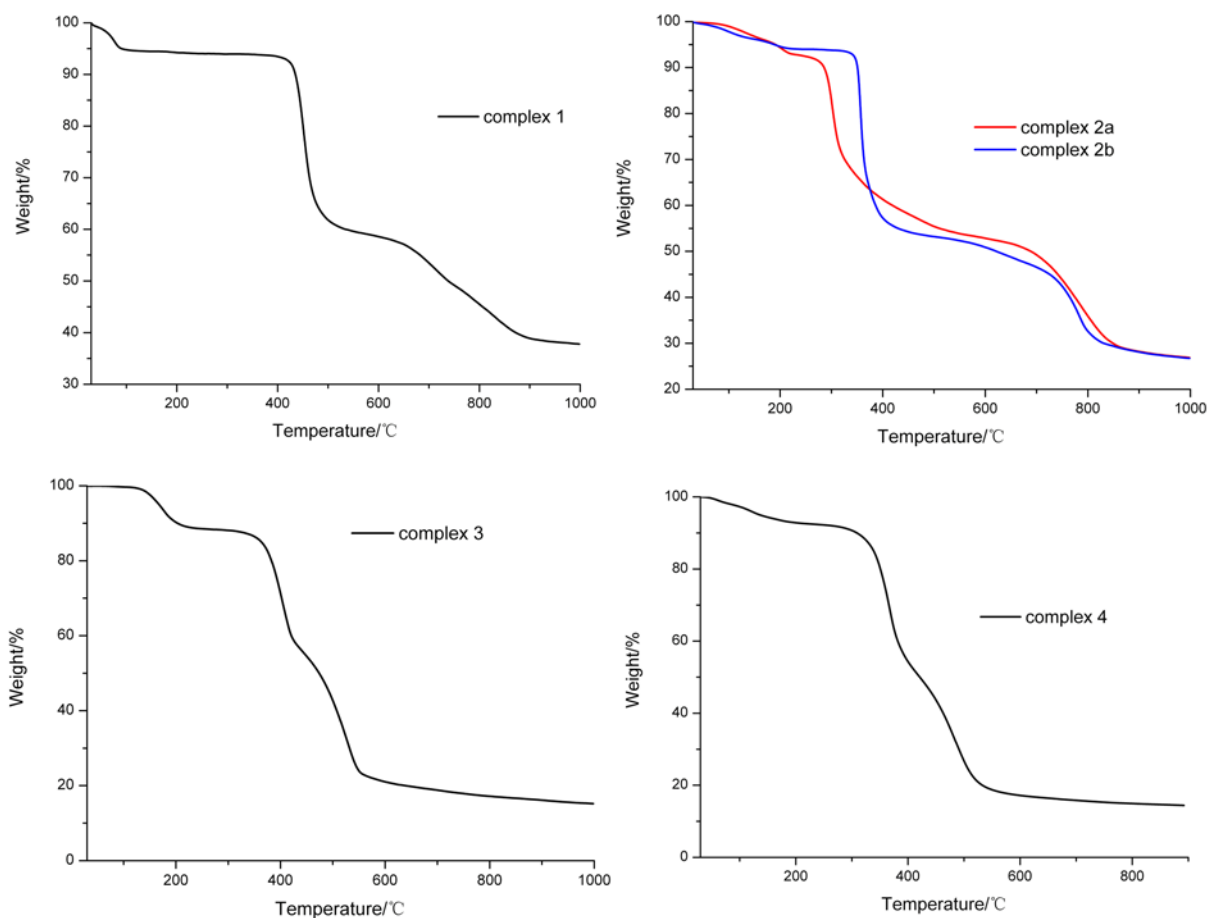

**Fig. S2.** TG curves for complexes 1-4.

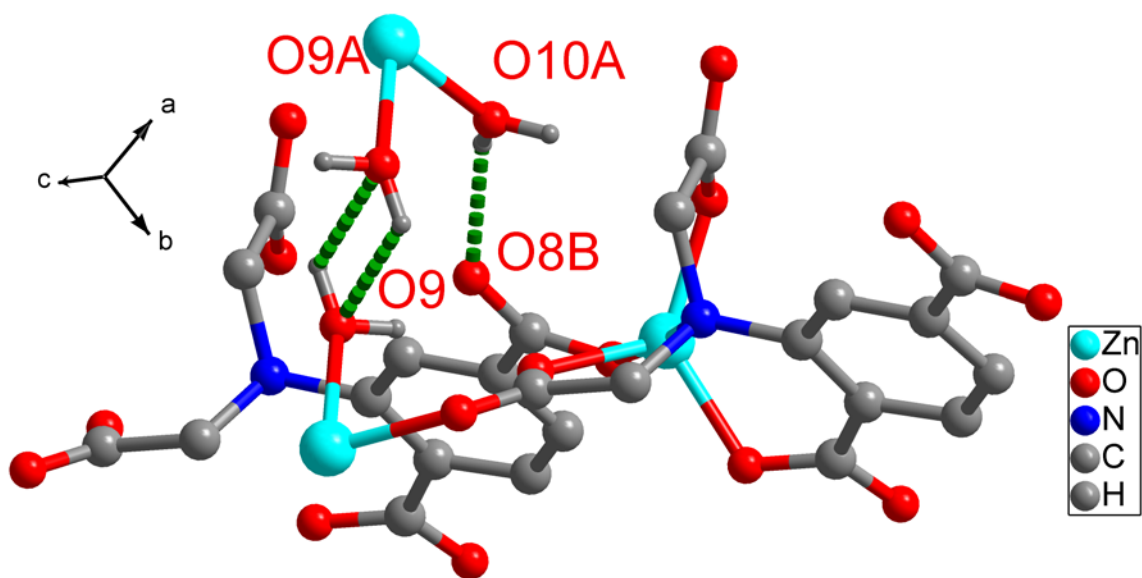

**Fig. S3.** Hydrogen bonds motif in **1**. symmetry codes, A:  $-x, -y, 2-z$ ; B:  $x, y, 1+z$ . O9...O9A distance is 2.8894(61) Å and O8B...O10A is 2.6866(60) Å.

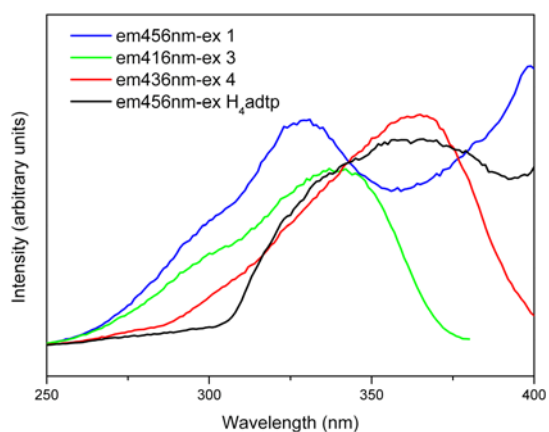

**Fig. S4.** Luminescent excitation spectra for complexes **1**, **3**, **4** and H<sub>4</sub>adtp.

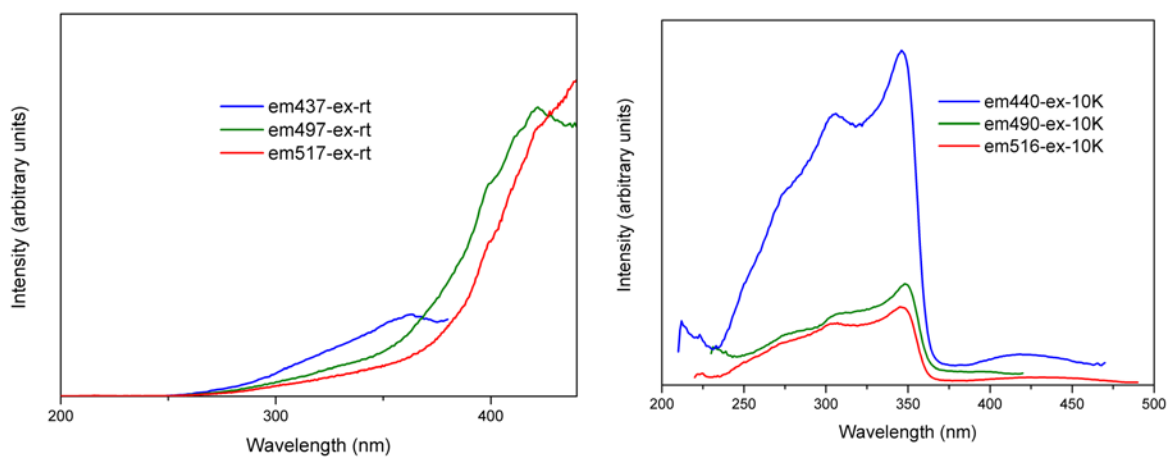

**Fig. S5.** Luminescent excitation spectra for **2a** at room temperature (left) and 10 K (right).
